# Supplementary material for: Immobilization of RNase S-Peptide on a single-stranded DNA-fixed gold surface and effective masking of its surface by an acridinyl poly(ethylene glycol)
Source: Royal Society of Chemistry journal article supplement (doi:10.1039/b508166a), 2005-11-23
Supplement: b508166a.pdf [file b508166a.pdf]

Supporting Information

Immobilization of RNase S-Peptide on a Single-Stranded DNA-Fixed Gold Surface and Effective Masking of Its Surface by an Acridinyl Poly(ethylene glycol)

Keiichi Ohtsuka<sup>a</sup>, Keiko Uemura<sup>b</sup>, Takahiko Nojima<sup>b</sup>, Michinori Waki<sup>a</sup> and Shigeori Takenaka<sup>a\*</sup>

<sup>a</sup>Department of Materials Science, Kyushu Institute of Technology, Kitakyushu-shi 804-8550, Japan:

<sup>b</sup>Department of Applied Chemistry, Kyushu University, Fukuoka 812-8581, Japan.

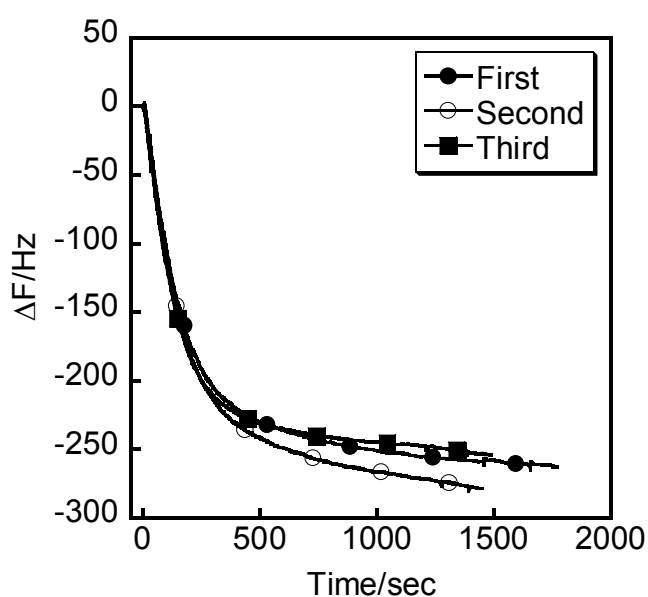

Figure S1. Frequency changes of 5'-HS-(CH<sub>2</sub>)<sub>6</sub>-CGA CGT TGT AAA ACG ACG GCC AGT-3'-fixed QCM gold sensor chip in 10 x SSC buffer after hybridization with 5'-ACT GGC CGT CGT TTT ACA ACG TCG-3'. The hybridization experiment was repeatedly carried out with this QCM chip after dehybridization (treated with water for 10 min at 60 °C). Standard deviation of this system was 13.9.
